# Supplementary material for: A Systematic Review of Atypical Endometriosis-Associated Biomarkers
Source: MDPI journal article supplement (doi:10.3390/ijms23084425), 2022-04-17
Supplement: s1 [file s1]

Supplementary Materials: Supplementary Figure S1: Risk of bias assessment according to the risk of bias tool by Clarity Group [19].

|                                     | Risk of bias domains |    |    |    |    |         |
|-------------------------------------|----------------------|----|----|----|----|---------|
|                                     | D1                   | D2 | D3 | D4 | D5 | Overall |
| Chalas et al. 1990 (20)             | +                    | +  | +  | -  | -  | +       |
| Ogawa et al. 2000 (21)              | +                    | +  | +  | -  | -  | +       |
| Bayramoglu et al. 2001 (22)         | +                    | +  | -  | -  | -  | -       |
| Nezhat et al. 2002 (23)             | +                    | +  | -  | -  | -  | -       |
| Del Carmen et al. 2003 (24)         | +                    | +  | X  | X  | -  | -       |
| Amemiya et al. 2004 (25)            | X                    | X  | -  | X  | X  | X       |
| Sainz de la Cuesta et al. 2004 (26) | +                    | +  | +  | +  | +  | +       |
| Akahane et al. 2005 (27)            | X                    | -  | X  | -  | X  | X       |
| Kato N et al. 2006 (15)             | +                    | +  | +  | -  | -  | +       |
| Ali-Fehmi et al. 2006 (28)          | +                    | +  | -  | -  | -  | -       |
| Akahane et al. 2007 (17)            | +                    | -  | +  | -  | -  | -       |
| Finas et al. 2008 (29)              | -                    | X  | -  | X  | X  | X       |
| Yamamoto et al. 2008 (30)           | +                    | +  | -  | -  | -  | -       |
| Wiegand et al. 2010 (11)            | -                    | X  | X  | X  | X  | X       |
| Yamamoto et al. 2010 (31)           | +                    | -  | +  | +  | -  | +       |
| Yamamoto et al. 2011 (14)           | +                    | -  | +  | +  | -  | +       |
| Kato et al. 2012 (32)               | +                    | +  | -  | -  | +  | +       |
| Xiao et al. 2012 (33)               | -                    | -  | +  | -  | -  | -       |
| Yamamoto et al. 2012 (34)           | +                    | +  | +  | +  | +  | +       |
| Yamamoto et al. 2012 (35)           | +                    | -  | +  | -  | -  | -       |
| Yamamoto et al. 2012 (36)           | +                    | -  | +  | +  | -  | -       |
| Lai et al. 2013 (37)                | +                    | X  | X  | X  | X  | X       |
| Vercellini et al. 2013 (38)         | +                    | -  | +  | -  | -  | -       |
| Lin et al. 2014 (39)                | +                    | +  | +  | +  | -  | +       |
| Suryawanshi et al. 2014 (40)        | +                    | +  | +  | +  | -  | +       |
| Anglesio et al. 2015 (41)           | +                    | X  | X  | X  | X  | X       |
| Matsumoto et al. 2015 (42)          | -                    | -  | X  | X  | -  | -       |
| Er et al. 2016 (43)                 | -                    | X  | X  | X  | X  | X       |
| Kato et al. 2016 (44)               | +                    | +  | +  | +  | -  | +       |
| Ma et al. 2016 (45)                 | +                    | +  | +  | -  | -  | +       |
| Stamp et al. 2016 (46)              | +                    | +  | +  | -  | -  | +       |
| Andersen et al. 2018 (47)           | +                    | +  | +  | +  | +  | +       |
| Zhang et al. 2018 (48)              | +                    | -  | -  | -  | -  | -       |
| Niguez-Sevilla et al. 2019 (49)     | +                    | +  | +  | +  | +  | +       |
| Jiao et al. 2019 (50)               | +                    | -  | -  | X  | X  | -       |
| Păvăleanu et al. 2020 (51)          | +                    | -  | +  | -  | X  | -       |
| Penciu et al. 2020 (52)             | +                    | -  | X  | X  | X  | X       |
| Lenz et al. 2021 (53)               | +                    | +  | -  | X  | -  | -       |
| Shin et al. 2021 (54)               | +                    | +  | +  | -  | -  | -       |

Study

Domains:  
D1: Bias arising from the randomization process.  
D2: Bias due to deviations from intended intervention.  
D3: Bias due to missing outcome data.  
D4: Bias in measurement of the outcome.  
D5: Bias in selection of the reported result.

Judgement  
X High  
- Some concerns  
+ Low
